# Supplementary material for: Biofouling Mitigation by Chloramination during Forward Osmosis Filtration of Wastewater
Source: MDPI journal article supplement (doi:10.3390/ijerph15102124), 2018-09-27
Supplement: s1 [file s1]

Supplementary Material

# Biofouling Mitigation by Chloramination during Forward Osmosis Filtration of Wastewater

Takahiro Fujioka, Kha H. Nguyen, Anh Tram Hoang, Tetsuro Ueyama, Hidenari Yasui, Mitsuharu Terashima, and Long D. Nghiem

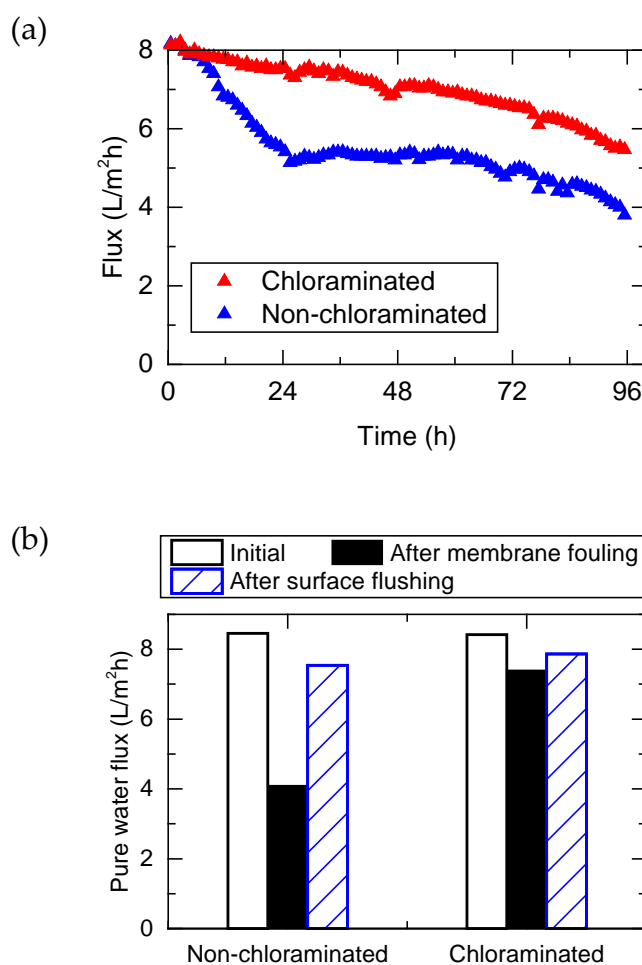

**Figure S1.** (a) Changes in flux during the pre-concentration of secondary wastewater effluent by FO membrane with and without chloramination, and (b) pure water flux before and after membrane fouling, and surface flushing.
